# Supplementary material for: Facile fabrication of novel efficient NiCo2O4@NiAl-LDH/NF and high electrochemical performance Fe2O3@rGO electrodes for hybrid supercapacitors
Source: Royal Society of Chemistry journal article supplement (doi:10.1039/d3se01714a), 2024-01-01
Supplement: d3se01714a1.pdf [file d3se01714a1.pdf]

## Supplementary information

### Facile fabrication of novel efficient $\text{NiCo}_2\text{O}_4@\text{NiAl-LDH/NF}$ and high electrochemical performance $\text{Fe}_2\text{O}_3@\text{rGO}$ electrodes for hybrid supercapacitor

Xiaoxuan Liu <sup>a,c,#</sup>, Wenwen Tan <sup>a,#</sup>, Zao Jiang <sup>b</sup>, Yu Hao <sup>c</sup>, Yong Wang <sup>a</sup>, Jingyi Ye <sup>a</sup>, Qi Feng <sup>a,\*</sup>, Longjun Xu <sup>a</sup>, Chenglun Liu <sup>a,d,\*</sup>

<sup>a</sup> State Key Laboratory of Coal Mine Disaster Dynamics and Control, Chongqing University, Chongqing, 400044, PR China

<sup>b</sup> School of Emergency Management, Xihua University, Chengdu, 610101, PR China

<sup>c</sup> Science and Technology Department, Chongqing Vocational Institute of Engineering, Chongqing 402260, PR China

<sup>d</sup> College of Chemistry and Chemical Engineering, Chongqing University, Chongqing, 400044, PR China

# Xiaoxuan Liu and Wenwen Tan contribute equally to the paper

\*. Corresponding Author

Tel: +86 18223208007. E-mail: qifeng868@cqu.edu.cn

Tel: +86 13883702103. E-mail: xlclj@cqu.edu.cn

To optimize the reaction conditions, were changed, and a series of  $\text{Fe}_2\text{O}_3@\text{rGO}$  composite materials were prepared for the different hydrothermal reaction temperatures. The electrochemical properties of the electrode materials were investigated in a three-electrode system. Fig. S1 (a)

shows the CV curve of  $\text{Fe}_2\text{O}_3@\text{rGO}$  prepared at different hydrothermal temperatures at a sweeping speed of  $10 \text{ mV s}^{-1}$ . It can be observed that the area enclosed by the closed CV curve is  $180^\circ\text{C} > 200^\circ\text{C} > 220^\circ\text{C}$ , indicating that  $180^\circ\text{C}$  is the best reaction temperature, which is consistent with the GCD curve corresponding to Fig. S1(b).

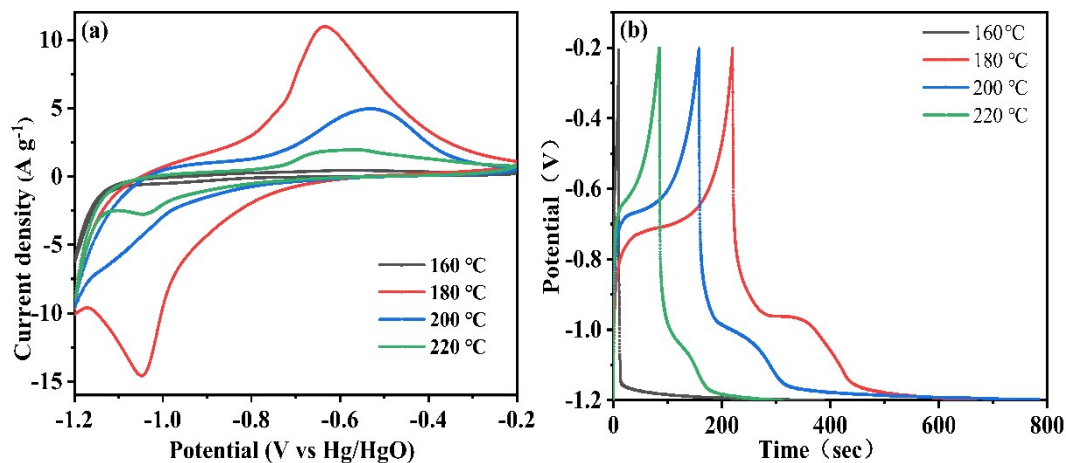

Fig. S1 (a) CV curves of  $\text{Fe}_2\text{O}_3@\text{rGO}$  prepared at different hydrothermal temperatures at  $10 \text{ mV s}^{-1}$  sweep speed; (b) GCD curves of  $\text{Fe}_2\text{O}_3@\text{rGO}$  prepared at different hydrothermal temperatures under  $2 \text{ A g}^{-1}$  current density.
